# Supplementary material for: Evaluating the Utility of Active Microwave Observations as a Snow Mission Concept Using Observing System Simulation Experiments
Source: Copernicus journal article supplement (doi:10.5194/tc-2022-220), 2022-11-09
Supplement: Supplementary file 1 [file tc-2022-220-supplement.pdf]

Supplement of

# Evaluating the Utility of Active Microwave Observations as a Snow Mission Concept Using Observing System Simulation Experiments

Eunsang Cho et al.

Correspondence to: Eunsang Cho (eunsang.cho@nasa.gov)

The copyright of individual parts of the supplement might differ from the CC BY 4.0 License.

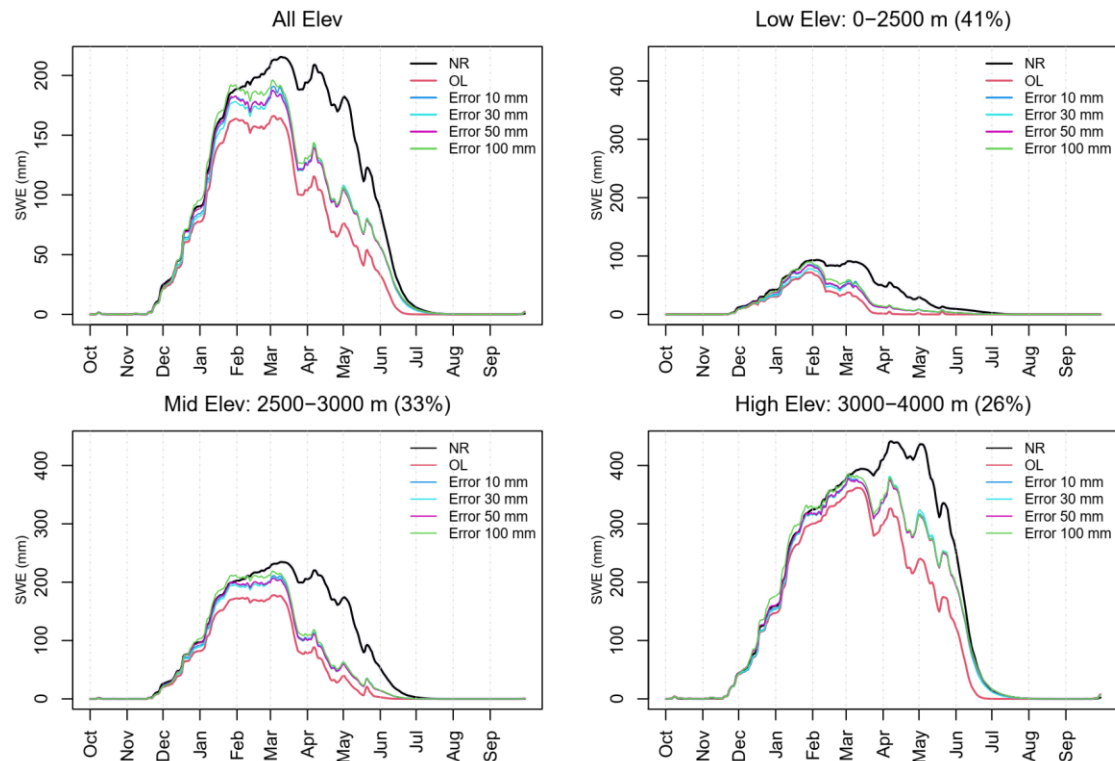

**Figure S1.** Domain-average SWE comparison between NR, OL, and DA experiments with different unbiased random error levels (10, 30, 50, and 100 mm of standard deviation) for the entire domain and subareas with three different elevation ranges. Note that the four DA scenarios have no deep snow and forest limits.

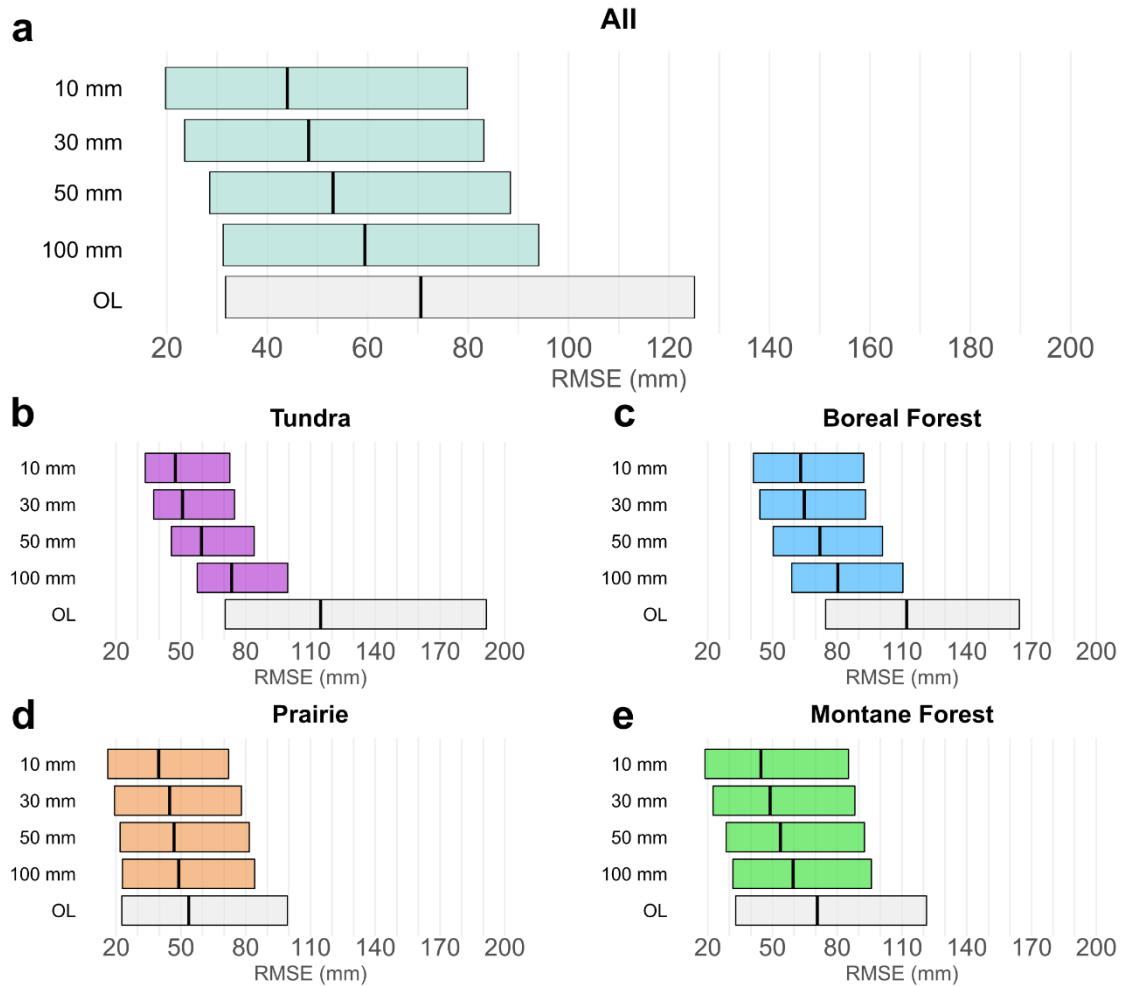

**Figure S2.** Boxplots of RMSE (mm) from all grid cells between four DA experiments with different unbiased random error levels (10, 30, 50, and 100 mm of standard deviation) and the Nature run (NR) relative to the open loop (OL) simulation for four seasonal snow classes, respectively. Note that the four DA scenarios have no deep snow and forest limits.

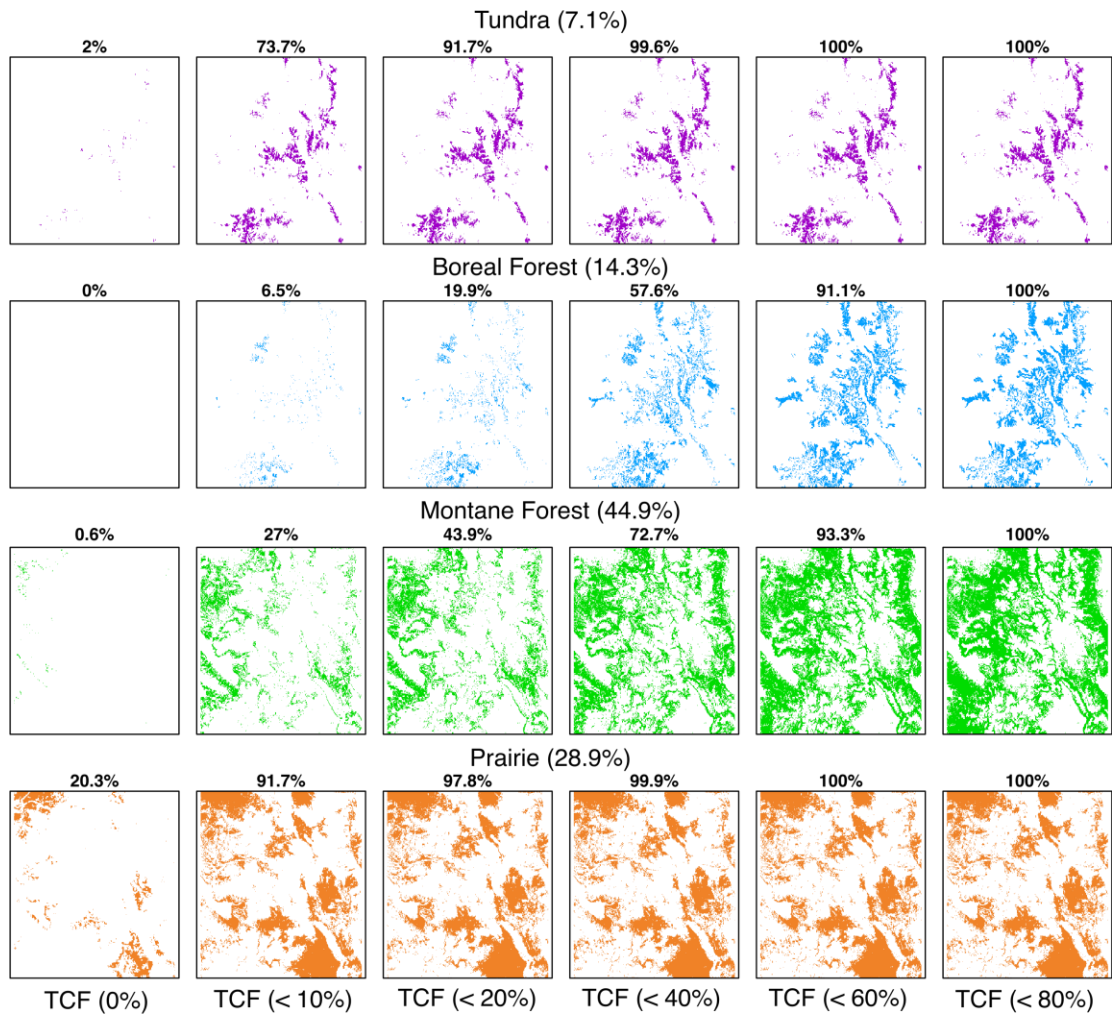

**Figure S3.** Maps of each Sturm's seasonal snow class with different TCF thresholds (0, 10, 20, 40, 60, and 80%).

**Table S1.** Perturbation parameters applied to Noah-MP prognostic state variables and meteorological forcing fields during the OL and DA scenarios

| Variable                          | Types          | Standard deviation   | AR1*  | Cross correlations |           |          |
|-----------------------------------|----------------|----------------------|-------|--------------------|-----------|----------|
| Noah-MP variables                 |                |                      |       | <i>SWE</i>         | <i>SD</i> |          |
| SWE                               | multiplicative | 0.01                 | 3 hr  | –                  | 0.9       |          |
| Snow depth ( <i>SD</i> )          | multiplicative | 0.02                 | 3 hr  | 0.9                | –         |          |
| Forcing variables                 |                |                      |       | <i>SW</i>          | <i>LW</i> | <i>P</i> |
| Shortwave radiation ( <i>SW</i> ) | multiplicative | 0.3                  | 1 day | –                  | -0.5      | -0.8     |
| Longwave radiation ( <i>LW</i> )  | additive       | 50 W m <sup>-2</sup> | 1 day | -0.5               | –         | 0.5      |
| Precipitation ( <i>P</i> )        | multiplicative | 0.5                  | 1 day | -0.8               | 0.5       | –        |

\*AR1: first-order autoregressive temporal correlation
